# Supplementary material for: Specific adsorption and determination of aspartame in soft drinks with a zein magnetic molecularly imprinted modified MGCE sensor
Source: Royal Society of Chemistry journal article supplement (doi:10.1039/d0ra10824c), 2021-01-01
Supplement: d0ra10824c1.pdf [file d0ra10824c1.pdf]

## Supplementary information

### **Specific adsorption and determination of aspartame in soft drinks with a zein magnetic molecularly imprinted modified MGCE sensor**

Ling Tan <sup>a, c</sup>, Qing-Yao Li <sup>a †</sup>, Yan-Jun Li <sup>a</sup>, Rong-Rong Ma <sup>a</sup>, Jia-Yuan He <sup>a</sup>, Zhuang-Fei Jiang <sup>a</sup>, Li-Li Yang <sup>a</sup>, Chong-Zhi Wang <sup>d</sup>, Ling Luo <sup>b, \*</sup>, Qi-Hui Zhang <sup>a, d, \*</sup>, Chun-Su Yuan <sup>d</sup>

<sup>a</sup> School of Chemistry and Chemical Engineering, Chongqing University, Chongqing 400044, China;

<sup>b</sup> Chongqing University Cancer Hospital & Chongqing Cancer Institute & Chongqing Cancer Hospital, Chongqing, 400030, China;

<sup>c</sup> School of Pharmaceutical Sciences, Chongqing University, Chongqing, 400044, China;

<sup>d</sup> Tang Center for Herbal Medicine Research and Department of Anesthesia & Critical Care, University of Chicago, Chicago, IL 60637, U.S.A..

<sup>†</sup>Co-first author: These authors contributed equally to the article.

\* Correspondence:

1\* E-mail: qhzhang@cqu.edu.cn (Q.H. Zhang), Fax: (+86)-023-65102531;

2\* E-mail: ling.luo.cqch@hotmail.com (L. Luo), Fax: (+86)-023-65311341.

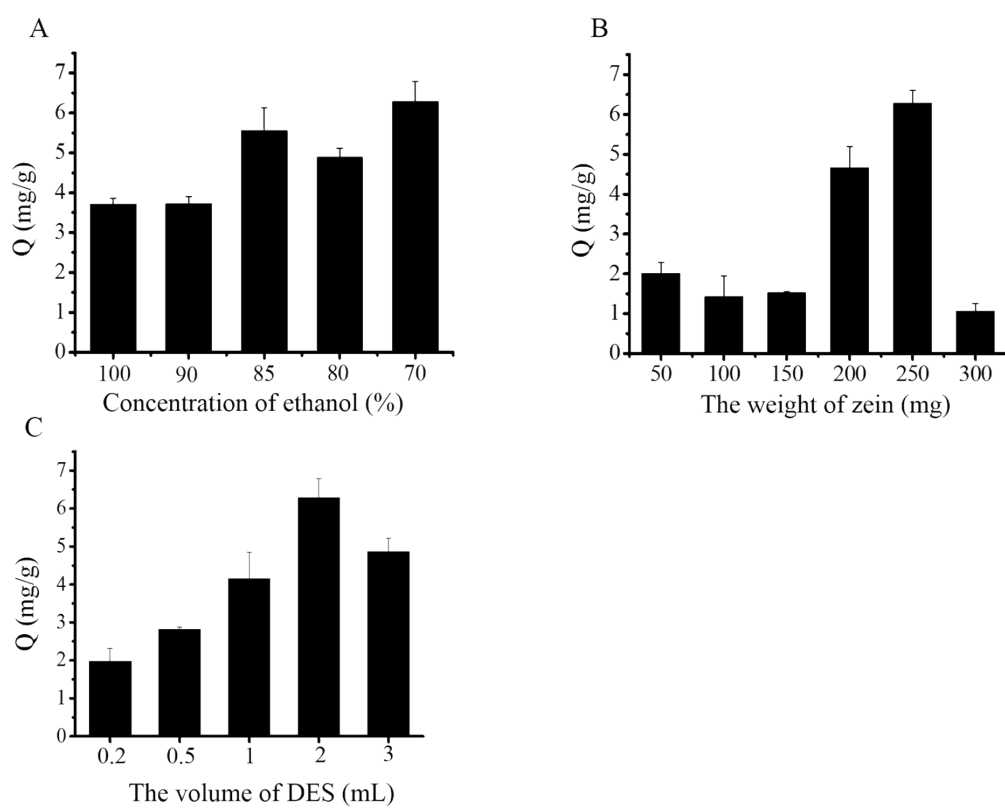

Figure S1. Effect of solvent system (A), the weight of zein (B), and the volume of DESs (C) on synthesis of ZDM-MIPs.

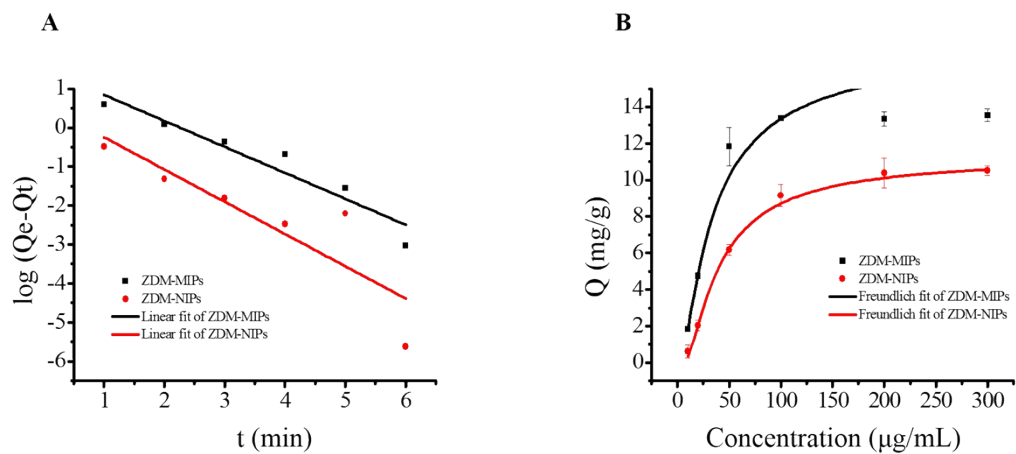

Fig. S2. (A) First-order kinetics model;

(B) ZDM-MIPs and ZDM-NIPs static adsorption results of ASP and Freundlich fit.

Table S1. Kinetic constants for the pseudo-first-order rate equations and

pseudo-second-order rate equations

|                 | <b>Pseudo-first-order</b> |       | <b>Pseudo-second-order</b> |       |
|-----------------|---------------------------|-------|----------------------------|-------|
|                 | $K_1(\text{min}^{-1})$    | $R^2$ | $K_1(\text{min}^{-1})$     | $R^2$ |
| <b>ZDM-MIPs</b> | 0.667                     | 0.899 | 0.032                      | 0.999 |
| <b>ZDM-NIPs</b> | 0.827                     | 0.715 | 0.270                      | 0.999 |

Table S2. Adsorption isotherm constants for Langmuir and Freundlich equations

|                 | <b>Langmuir</b> |       |       | <b>Freundlich</b> |       |       |
|-----------------|-----------------|-------|-------|-------------------|-------|-------|
|                 | $Q_m$           | $K_L$ | $R^2$ | $m$               | $K_F$ | $R^2$ |
| <b>ZDM-MIPs</b> | 14.95           | 0.002 | 0.999 | 0.557             | 0.792 | 0.998 |
| <b>ZDM-NIPs</b> | 10.76           | 6.76  | 0.998 | 0.817             | 0.150 | 0.997 |

Table S3. The selectivity parameters of ZDM-MIPs and ZDM-NIPs

|                             | <b>Aspartame</b> | <b>Acesulfame</b> | <b>Glycyrrhizin acid</b> |
|-----------------------------|------------------|-------------------|--------------------------|
| <b>Q<sub>ZDM-MIPs</sub></b> | 10.01            | 1.57              | 1.63                     |
| <b>Q<sub>ZDM-NIPs</sub></b> | 2.02             | 1.38              | 1.19                     |
| <b><math>\alpha</math></b>  | 4.95             | 1.13              | 1.36                     |
| <b><math>\beta</math></b>   | --               | 4.38              | 3.64                     |
